# Supplementary material for: Buffering capacity of protein-based model food systems in the context of gastric digestion
Source: Royal Society of Chemistry journal article supplement (doi:10.1039/c9fo01160a), 2019-01-01
Supplement: c9fo01160a1.pdf [file c9fo01160a1.pdf]

## SUPPLEMENTARY MATERIAL

**Supplementary Table 1.** Amino acids concentrations (mg amino acid/g protein) for all egg, whey, soy, and pea proteins.

| Amino acids  | Amino acid concentration (mg amino acid/g protein) |             |             |             |
|--------------|----------------------------------------------------|-------------|-------------|-------------|
|              | Egg                                                | Whey        | Soy         | Pea         |
| Cysteic acid | 0 ± 0                                              | 0 ± 0       | 0.6 ± 0.1   | 1.4 ± 0.1   |
| Asx          | 104.8 ± 0.2                                        | 110.6 ± 0.6 | 117.4 ± 0.4 | 118.2 ± 0.1 |
| Thr          | 44.9 ± 0.3                                         | 72.8 ± 0.1  | 38.8 ± 0.1  | 40.5 ± 0.3  |
| Ser          | 64.3 ± 0.3                                         | 47.1 ± 0.3  | 50.3 ± 1.0  | 50.6 ± 0.3  |
| Glx          | 133.0 ± 0.8                                        | 175.0 ± 2.9 | 197.9 ± 3.0 | 162.2 ± 2.3 |
| Pro          | 35.7 ± 0.6                                         | 59.8 ± 1.1  | 52.9 ± 0.1  | 43.5 ± 0.2  |
| Gly          | 36.0 ± 0.1                                         | 16.8 ± 0.1  | 42.4 ± 0.2  | 42.0 ± 0.1  |
| Ala          | 62.8 ± 0.1                                         | 53.6 ± 0.3  | 44.4 ± 0.4  | 45.8 ± 0.1  |
| Cystine      | 13.8 ± 0.2                                         | 13.2 ± 0.5  | 5.5 ± 0.8   | 4.1 ± 0.2   |
| Val          | 79.1 ± 0.3                                         | 60.9 ± 0.1  | 49.1 ± 0.3  | 53.6 ± 0.1  |
| Met          | 13.4 ± 0.4                                         | 8.9 ± 0.9   | 5.7 ± 0.6   | 5.6 ± 0.4   |
| Ile          | 53.6 ± 0.3                                         | 67.9 ± 0.7  | 48.5 ± 0.2  | 49.7 ± 0.1  |
| Leu          | 87.5 ± 0.2                                         | 109.8 ± 0.2 | 83.6 ± 0.4  | 89.4 ± 0.3  |
| Tyr          | 39.4 ± 0.8                                         | 28.2 ± 1.5  | 39.2 ± 0.6  | 40.0 ± 0.2  |
| Phe          | 62.6 ± 1.6                                         | 30.8 ± 0.9  | 55.6 ± 0.2  | 58.3 ± 0.3  |
| His          | 38.7 ± 0.7                                         | 24.6 ± 1.0  | 25.3 ± 0.5  | 23.7 ± 0.1  |
| Lys          | 72.6 ± 0.4                                         | 99.7 ± 0.1  | 65.3 ± 0.6  | 83.1 ± 0.7  |
| Trp          | 0 ± 0                                              | 0 ± 0       | 0 ± 0       | 0 ± 0       |
| Arg          | 57.8 ± 0.6                                         | 20.2 ± 0.1  | 77.5 ± 0.7  | 88.2 ± 0.2  |

**A. 11% Egg Protein**

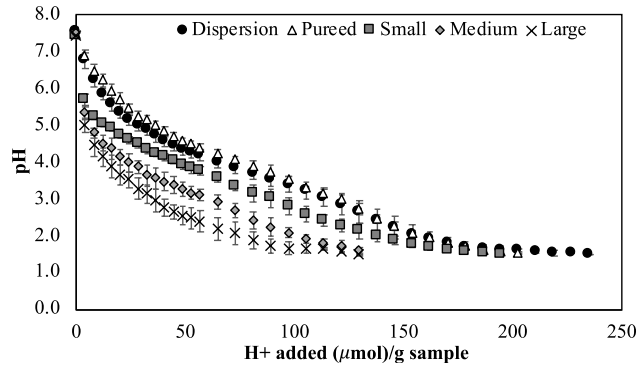

**B. 11% Whey Protein**

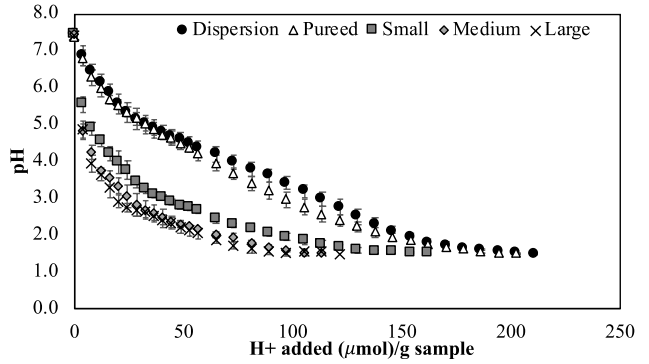

**C. 11% Egg Protein**

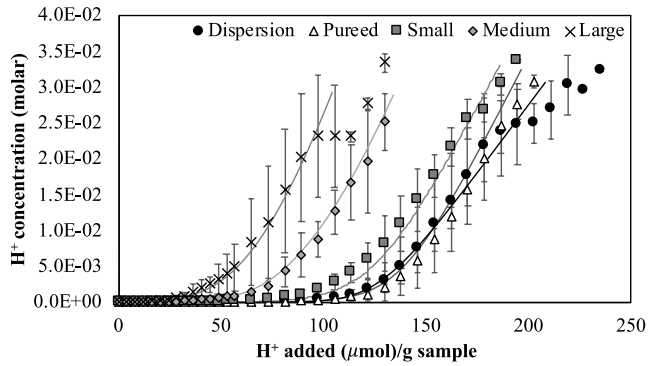

**D. 11% Whey Protein**

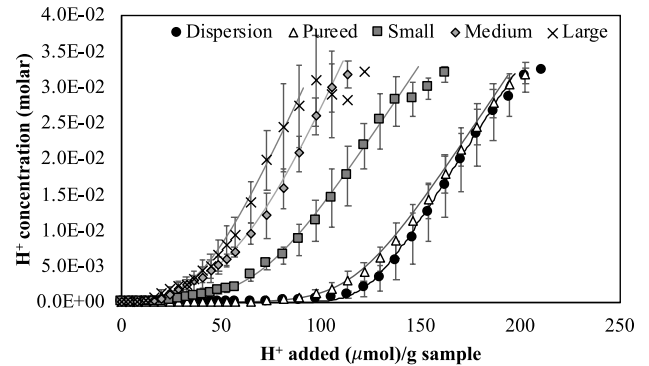

**Supplementary Figure 1.** Acid titration curves for 11% egg protein (A) and whey protein samples (B) for all particle sizes. Empirical model plots for 11% egg protein (C) and whey protein samples (D) for all particle sizes. Symbols represent the average ( $n = 3$ ) and error bars represent the standard deviation (error bars in (A) and (B) are too small to be seen). Solid lines in C and D represent the predicted curves from the empirical model.

**A. 20% Egg Protein**

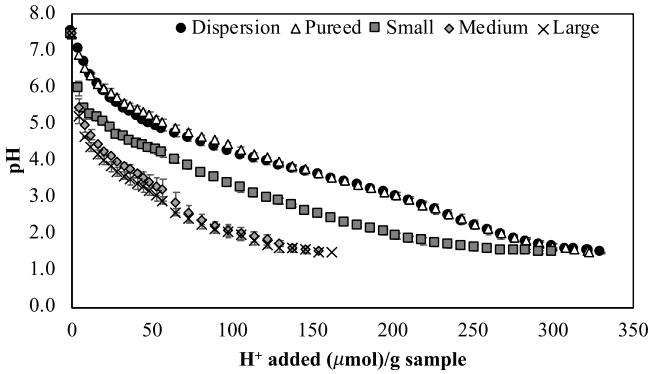

**B. 20% Whey Protein**

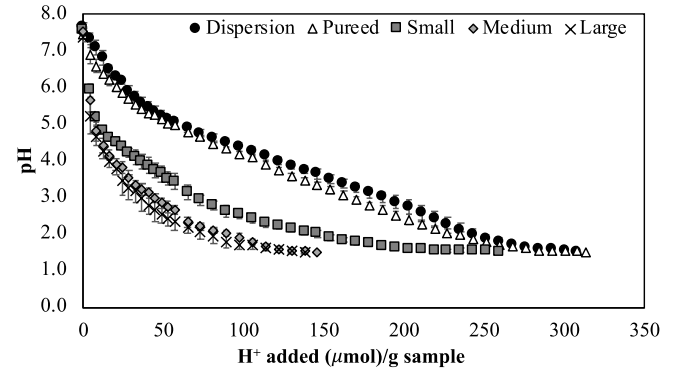

**C. 20% Egg Protein**

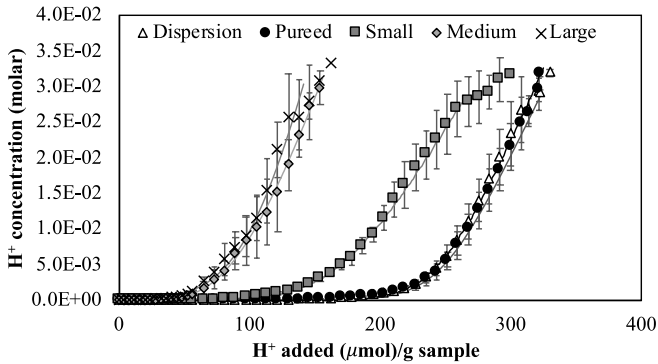

**D. 20% Whey Protein**

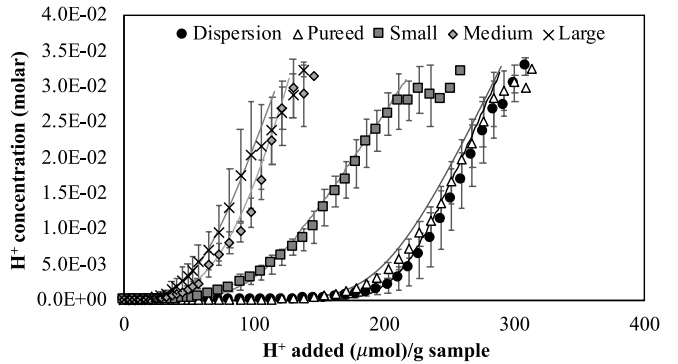

**Supplementary Figure 2.** Acid titration curves for 20% egg protein (A) and whey protein samples (B) for all particle sizes. Empirical model plots for 20% egg protein (C) and whey protein samples (D) for all particle sizes. Symbols represent the average ( $n = 3$ ) and error bars represent the standard deviation (error bars in (A) and (B) are too small to be seen). Solid lines in C and D represent the predicted curves from the empirical model.
